# Supplementary material
Source: publisher figshare collection journal article supplement (https://tandf.figshare.com/ndownloader/files/14442065)

**Supplementary Material:**

**Table S1:** Listing of all samples and data used in this study. Hydrogen data represent an average value of two samples per individual, while carbon and nitrogen data are based on one sample per individual. Statistical overview data for each group are given in Table 3.

| Group | Individual number | Generation | Hydrogen isotopic exchangeability (% ) of collagen | *δ*2H (‰ ) collagen | 2Hatom % in collagen | Nitrogen in collagen (wt. %) | Carbon in collagen (wt. %) | *δ* 15N (‰) collagen | *δ* 13C (‰) collagen | Collagen atomic C/N ratio | *δ*2H (‰) water | *δ*2H (‰) bulk dry food | *δ*13C (‰) bulk dry food | *δ*15N (‰) bulk dry food |
| --- | --- | --- | --- | --- | --- | --- | --- | --- | --- | --- | --- | --- | --- | --- |
|
|
| **A** | 1 | mother | 23.1 | -142 | 0.0134 | 14.0 | 44.1 | 5.5 | -18.1 | 3.2 | -36 | -52 | -22.2 | 1.0 |
| **A** | 2 | mother | 21.6 | -135 | 0.0135 | 14.0 | 44.3 | 5.2 | -19.0 | 3.2 | -36 | -52 | -22.2 | 1.0 |
| **A** | 3 | pup | 20.4 | -135 | 0.0135 | 14.1 | 44.8 | 4.5 | -19.4 | 3.2 | -36 | -52 | -22.2 | 1.0 |
| **A** | 4 | pup | 22.9 | -119 | 0.0137 | 14.3 | 44.1 | 4.4 | -19.3 | 3.1 | -36 | -52 | -22.2 | 1.0 |
| **A** | 5 | pup | 22.9 | -123 | 0.0137 | 15.9 | 44.6 | 5.1 | -19.3 | 2.8 | -36 | -52 | -22.2 | 1.0 |
| **A** | 6 | pup | 23.5 | -111 | 0.0138 | 15.8 | 44.6 | 5.5 | -19.4 | 2.8 | -36 | -52 | -22.2 | 1.0 |
| **A** | 7 | pup | 22.0 | -129 | 0.0136 | 14.4 | 45.4 | 4.9 | -19.6 | 3.2 | -36 | -52 | -22.2 | 1.0 |
| **A** | 8 | pup | 23.9 | -112 | 0.0138 | 14.3 | 44.2 | 4.9 | -19.3 | 3.1 | -36 | -52 | -22.2 | 1.0 |
| **A** | 9 | pup | 22.7 | -132 | 0.0135 | 14.1 | 44.6 | 4.6 | -19.5 | 3.2 | -36 | -52 | -22.2 | 1.0 |
| **A** | 10 | pup | 23.2 | -122 | 0.0137 | 15.1 | 45.4 | 5.1 | -19.8 | 3.0 | -36 | -52 | -22.2 | 1.0 |
| **A** | 11 | pup | 23.6 | -122 | 0.0137 | 15.1 | 43.1 | 4.8 | -19.6 | 2.9 | -36 | -52 | -22.2 | 1.0 |
| **A** | 12 | pup | 23.4 | -121 | 0.0137 | 16.0 | 45.8 | 4.6 | -19.3 | 2.9 | -36 | -52 | -22.2 | 1.0 |
| **B** | 1 | mother | 20.9 | -13 | 0.0154 | 15.4 | 44.3 | 5.4 | -18.8 | 2.9 | 952 | -52 | -22.2 | 1.0 |
| **B** | 2 | mother | 22.3 | -4 | 0.0155 | 13.5 | 45.3 | 5.0 | -19.1 | 3.4 | 952 | -52 | -22.2 | 1.0 |
| **B** | 3 | pup | 21.1 | 121 | 0.0175 | 13.5 | 44.7 | 5.0 | -19.7 | 3.3 | 952 | -52 | -22.2 | 1.0 |
| **B** | 4 | pup | 21.1 | 86 | 0.0169 | 14.2 | 44.3 | 4.6 | -19.1 | 3.1 | 952 | -52 | -22.2 | 1.0 |
| **B** | 5 | pup | 23.3 | 111 | 0.0173 | 13.8 | 44.6 | 5.3 | -19.7 | 3.2 | 952 | -52 | -22.2 | 1.0 |
| **B** | 6 | pup | 23.2 | 105 | 0.0172 | 13.9 | 44.9 | 4.6 | -19.6 | 3.2 | 952 | -52 | -22.2 | 1.0 |
| **B** | 7 | pup | 24.2 | 134 | 0.0177 | 16.1 | 45.2 | 6.2 | -19.1 | 2.8 | 952 | -52 | -22.2 | 1.0 |
| **B** | 8 | pup | 23.5 | 138 | 0.0177 | 14.4 | 44.2 | 4.8 | -19.3 | 3.1 | 952 | -52 | -22.2 | 1.0 |
| **B** | 9 | pup | 22.9 | 135 | 0.0177 | 14.3 | 44.7 | 4.9 | -19.0 | 3.1 | 952 | -52 | -22.2 | 1.0 |
| **B** | 10 | pup | 23.0 | 132 | 0.0176 | 14.3 | 45.0 | 4.6 | -19.3 | 3.1 | 952 | -52 | -22.2 | 1.0 |
| **B** | 11 | pup | 22.3 | 120 | 0.0174 | 14.3 | 44.5 | 5.1 | -19.5 | 3.1 | 952 | -52 | -22.2 | 1.0 |
| **B** | 12 | pup | 22.7 | 111 | 0.0173 | 15.5 | 45.7 | 5.3 | -19.9 | 2.9 | 952 | -52 | -22.2 | 1.0 |
| **C** | 1 | mother | 20.6 | 198 | 0.0187 | 14.2 | 45.2 | 23.0 | -8.3 | 3.2 | -36 | 246 | -19.2 | 22.5 |
| **C** | 2 | mother | 21.0 | 197 | 0.0186 | 14.1 | 44.5 | 20.9 | -9.0 | 3.2 | -36 | 246 | -19.2 | 22.5 |
| **C** | 3 | pup | 19.6 | 357 | 0.0211 | 15.9 | 45.0 | 40.6 | 0.3 | 2.8 | -36 | 246 | -19.2 | 22.5 |
| **C** | 4 | pup | 20.1 | 359 | 0.0212 | 13.8 | 44.8 | 45.9 | 4.7 | 3.3 | -36 | 246 | -19.2 | 22.5 |
| **C** | 5 | pup | 22.9 | 417 | 0.0221 | 14.1 | 45.2 | 52.7 | 9.6 | 3.2 | -36 | 246 | -19.2 | 22.5 |
| **C** | 6 | pup | 21.5 | 386 | 0.0216 | 14.0 | 44.8 | 51.3 | 8.5 | 3.2 | -36 | 246 | -19.2 | 22.5 |
| **C** | 7 | pup | 21.7 | 477 | 0.0230 | 15.7 | 44.7 | 54.7 | 10.2 | 2.9 | -36 | 246 | -19.2 | 22.5 |
| **C** | 8 | pup | 22.5 | 487 | 0.0232 | 14.1 | 43.6 | 41.1 | 2.3 | 3.1 | -36 | 246 | -19.2 | 22.5 |
| **C** | 9 | pup | 22.6 | 400 | 0.0218 | 13.8 | 44.7 | 55.1 | 10.0 | 3.2 | -36 | 246 | -19.2 | 22.5 |
| **C** | 10 | pup | 23.6 | 352 | 0.0211 | 14.7 | 45.0 | 44.0 | 3.8 | 3.1 | -36 | 246 | -19.2 | 22.5 |
| **C** | 11 | pup | 20.2 | 421 | 0.0221 | 15.2 | 44.2 | 51.6 | 7.9 | 2.9 | -36 | 246 | -19.2 | 22.5 |
| **C** | 12 | pup | 23.4 | 438 | 0.0224 | 16.1 | 44.2 | 54.1 | 10.5 | 2.7 | -36 | 246 | -19.2 | 22.5 |
| **D** | 1 | mother | 22.4 | 273 | 0.0198 | 15.6 | 44.7 | 21.7 | -9.5 | 2.9 | 952 | 246 | -19.2 | 22.5 |
| **D** | 2 | mother | 20.2 | 236 | 0.0192 | 14.5 | 44.6 | 24.2 | -7.1 | 3.1 | 952 | 246 | -19.2 | 22.5 |
| **D** | 3 | pup | 21.7 | 680 | 0.0262 | 14.7 | 45.2 | 55.2 | 10.0 | 3.1 | 952 | 246 | -19.2 | 22.5 |
| **D** | 4 | pup | 23.9 | 615 | 0.0252 | 15.3 | 43.8 | 45.5 | 4.3 | 2.9 | 952 | 246 | -19.2 | 22.5 |
| **D** | 5 | pup | 21.5 | 600 | 0.0249 | 14.1 | 44.7 | 45.7 | 3.7 | 3.2 | 952 | 246 | -19.2 | 22.5 |
| **D** | 6 | pup | 22.8 | 671 | 0.0260 | 15.3 | 44.1 | 48.8 | 6.4 | 2.9 | 952 | 246 | -19.2 | 22.5 |
| **D** | 7 | pup | 22.6 | 659 | 0.0258 | 15.7 | 43.2 | 57.5 | 12.1 | 2.8 | 952 | 246 | -19.2 | 22.5 |
| **D** | 8 | pup | 23.0 | 634 | 0.0254 | 15.8 | 44.9 | 39.9 | 0.2 | 2.9 | 952 | 246 | -19.2 | 22.5 |
| **D** | 9 | pup | 20.3 | 746 | 0.0272 | 14.3 | 45.1 | 52.1 | 6.6 | 3.2 | 952 | 246 | -19.2 | 22.5 |
| **D** | 10 | pup | 21.9 | 629 | 0.0254 | 15.5 | 43.5 | 43.7 | 3.6 | 2.8 | 952 | 246 | -19.2 | 22.5 |
| **D** | 11 | pup | 21.2 | 735 | 0.0270 | 15.9 | 44.5 | 48.1 | 6.0 | 2.8 | 952 | 246 | -19.2 | 22.5 |
| **D** | 12 | pup | 21.6 | 696 | 0.0264 | 12.9 | 41.0 | 54.2 | 9.4 | 3.2 | 952 | 246 | -19.2 | 22.5 |

**Table S2:** Description of Purina® 5015 Mouse Diet composition from labdiet.com. Reproduced from <https://www.labdiet.com/cs/groups/lolweb/@labdiet/documents/web_content/mdrf/mdi4/~edisp/ducm04_028439.pdf> with permission from *PMI Nutrition International*.


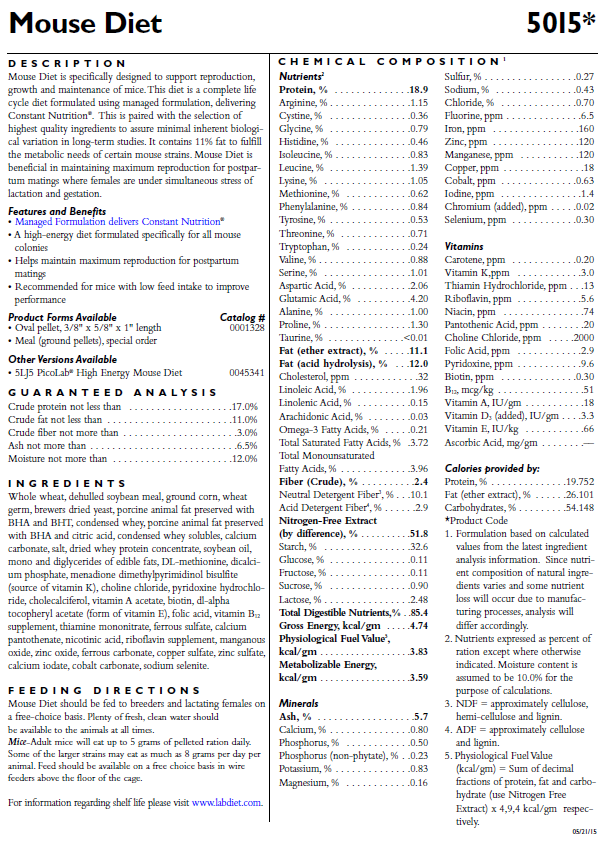

Supplement: Supplementary file 1 [file 14442065]
